# Supplementary material for: Multi-omics analyses of early liver injury reveals cell-type-specific transcriptional and epigenomic shift
Source: PubMed Central journal article supplement (PMC8684102; doi:10.1186/s12864-021-08173-1), 2021-12-18
Supplement: 12864_2021_8173_MOESM1_ESM.pdf [file 12864_2021_8173_MOESM1_ESM.pdf]

**a**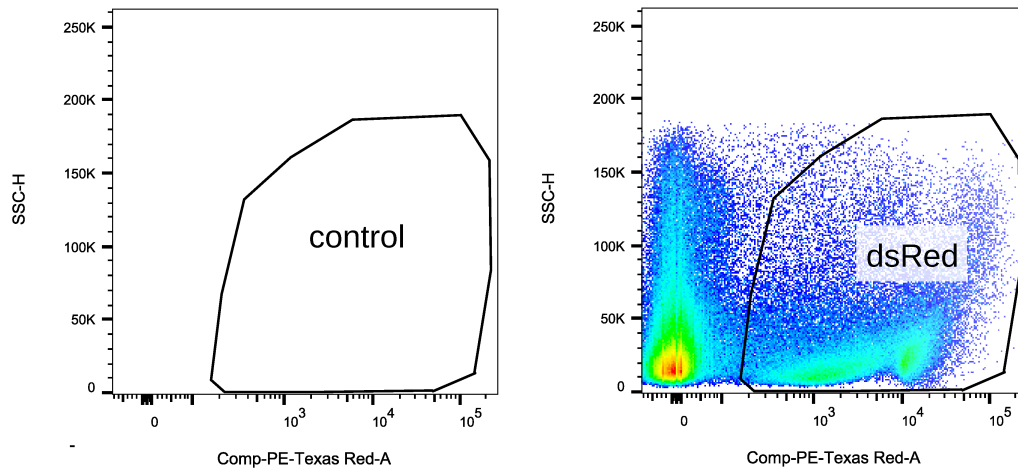**b**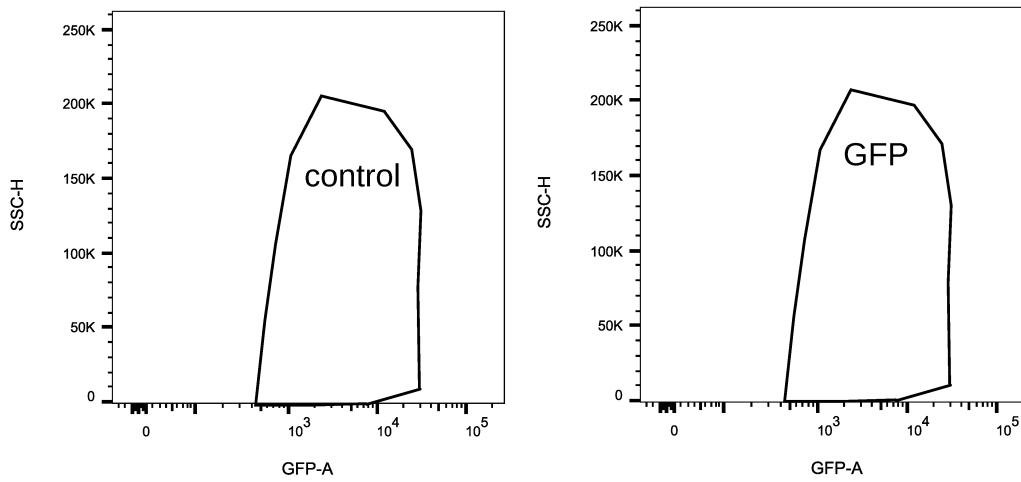**c**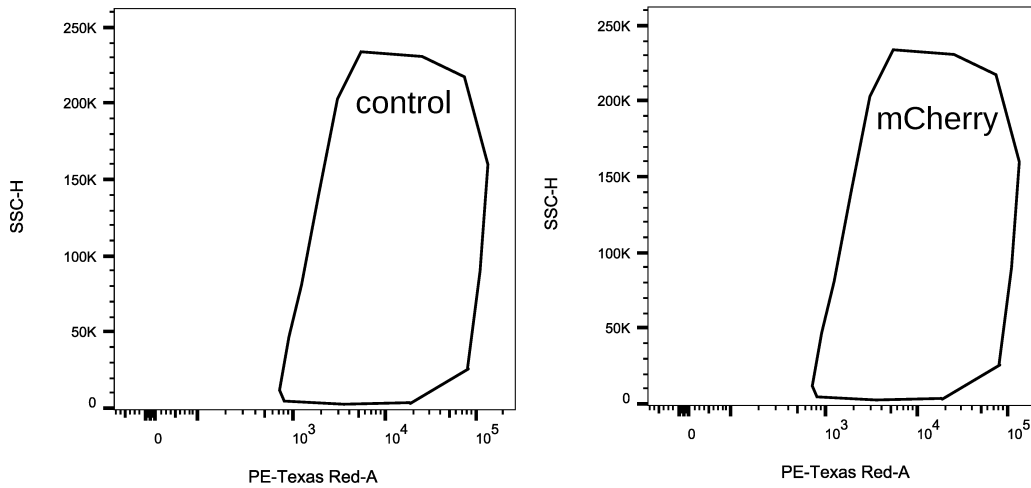

**Supplementary Figure 1. FACS-sorting on liver cell populations.** SSC-A vs fluorochrome-A was applied to identify fluorescent cells.

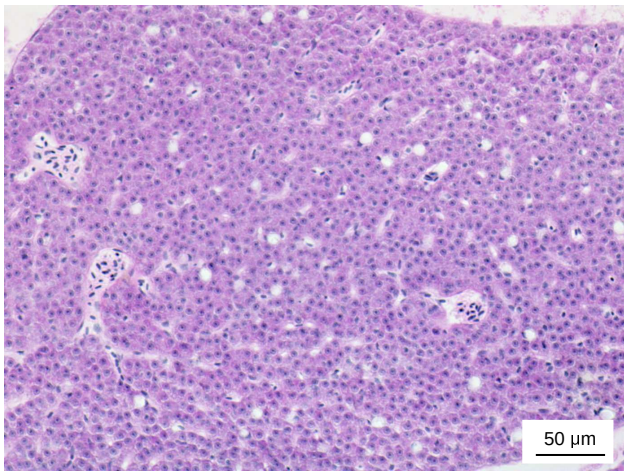

ctrl

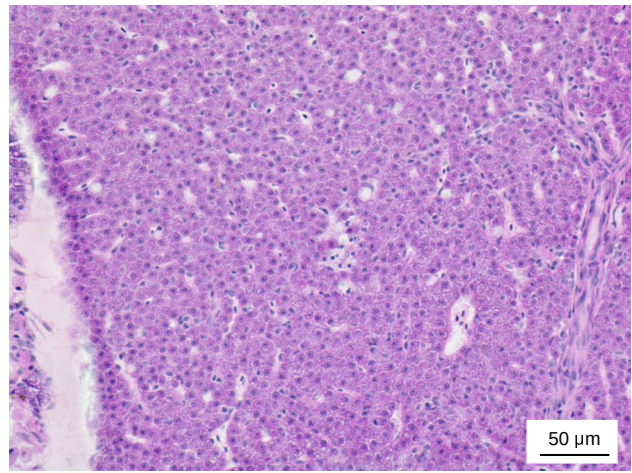

TAA 300 mg

**Supplementary Figure 2. Micrographs of liver sections from control and 300mg/kg b.m. TAA-treated zebrafish.** Images were taken with the ZEISS Imager M1 microscope using the 20X magnification lens. Red, Green and Blue channel images were merged using ImageJ software.

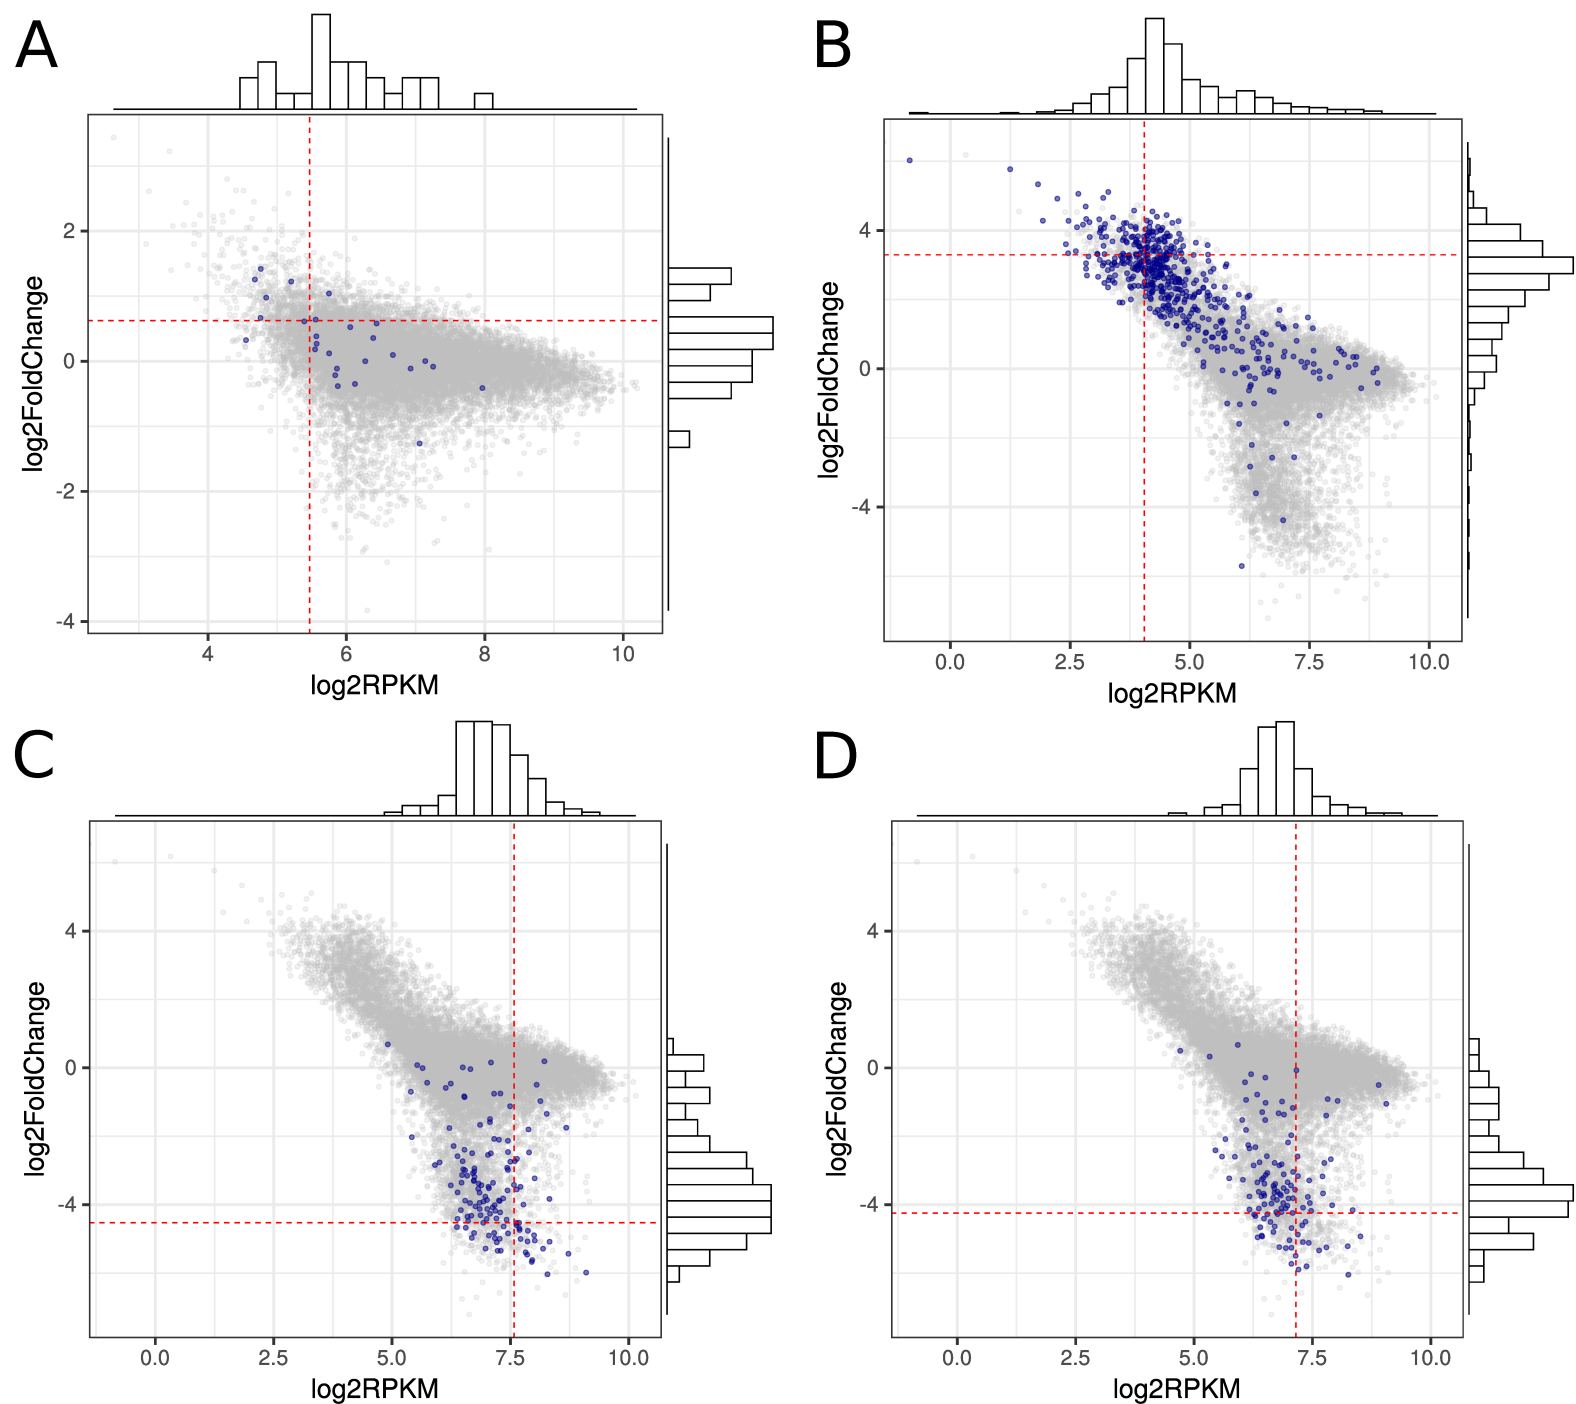

**Supplementary Figure 3. Accessibility levels and change in response to treatment in selected cell types and clusters.** a. Scatterplot presents the relation between accessibility level in control HSCs expressed as log<sub>2</sub> reads per kilobase million and change in accessibility between control and treated HSCs expressed as log<sub>2</sub> fold change. Blue points present peaks associated with genes from cluster A, grey points all peaks in HSCs. Red dotted lines mark the 25th percentile on each axis; b. Scatterplot presents the relation between accessibility level in control ECs expressed as log<sub>2</sub> reads per kilobase million and change in accessibility between control and treated ECs expressed as log<sub>2</sub> fold change. Blue points present peaks associated with genes from cluster B, grey points all peaks in HSCs. Red dotted lines mark the 25th percentile on each axis; c. Scatterplot presents the relation between accessibility level in control ECs expressed as log<sub>2</sub> reads per kilobase million and change in accessibility between control and treated ECs expressed as log<sub>2</sub> fold change. Blue points present peaks associated with genes from cluster G, grey points all peaks in HSCs. Red dotted lines mark the 25th percentile on each axis; d. Scatterplot presents the relation between accessibility level in control ECs expressed as log<sub>2</sub> reads per kilobase million and change in accessibility between control and treated ECs expressed as log<sub>2</sub> fold change. Blue points present peaks associated with genes from cluster H, grey points all peaks in HSCs. Red dotted lines mark the 25th percentile on each axis.

A

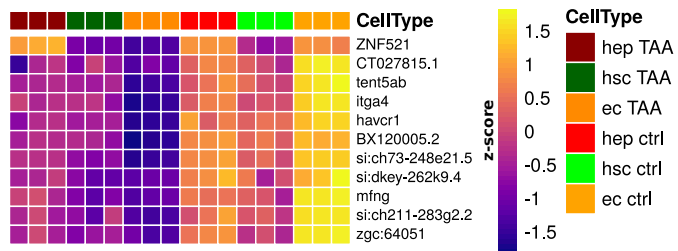

B

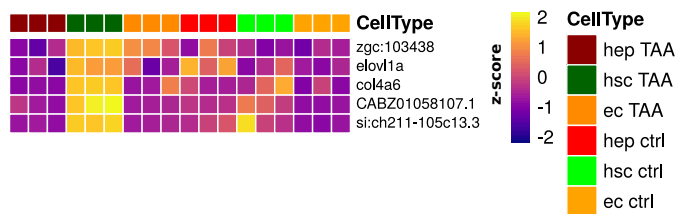

C

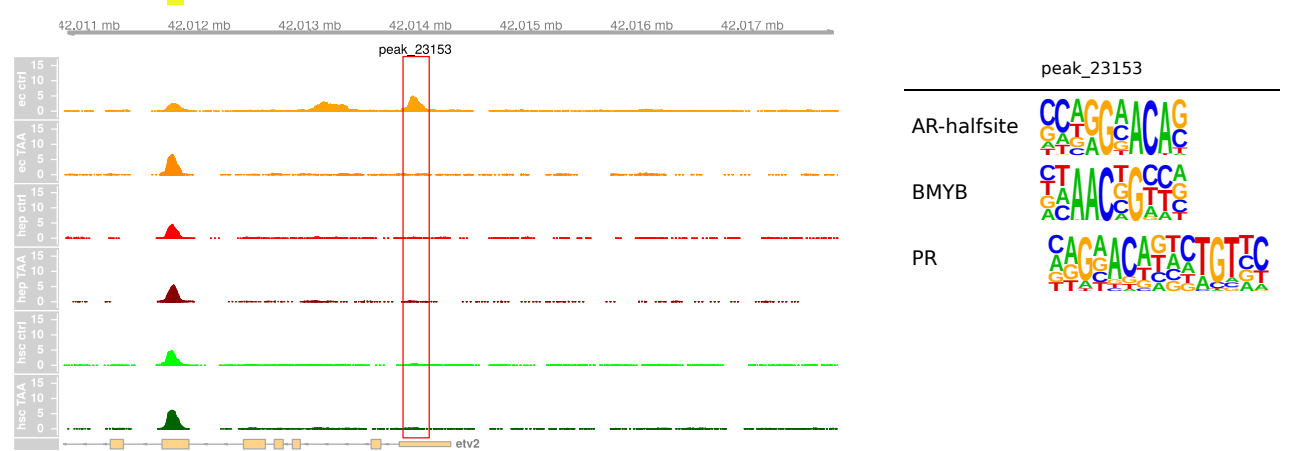

D

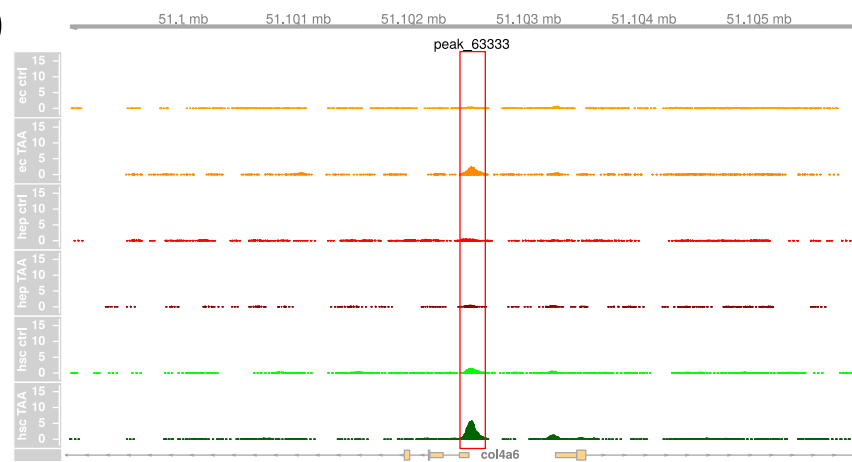

E

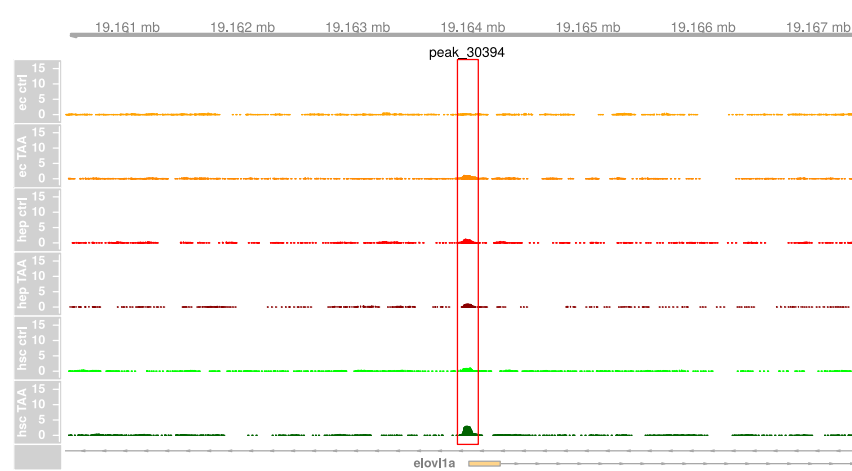

Supplementary Figure 4. Cell type specific accessibility changes in response to TAA treatment.

**Supplementary Figure 4. Cell type specific accessibility changes in response to TAA treatment.**

a. Heatmap of selected genes in each cell type. Genes were selected based on accessibility patterns from genes in cluster H; b. Heatmap of selected genes in each cell type. Genes were selected based on accessibility patterns from genes in cluster A; c. Genomic browser snapshot at *etv2* promoter localization with accessibility track expressed as reads per million. Highlighted peak was used as a selection criteria in Fig. 6B., its three most enriched motifs are shown next to the browser track; d. Genomic browser snapshot at *col4a6* promoter localization with accessibility track expressed as reads per million. Highlighted peak was used as a selection criteria in b.; e. Genomic browser snapshot at *elovl1a* promoter localization with accessibility track expressed as reads per million. Highlighted peak was used as a selection criteria in b.

a

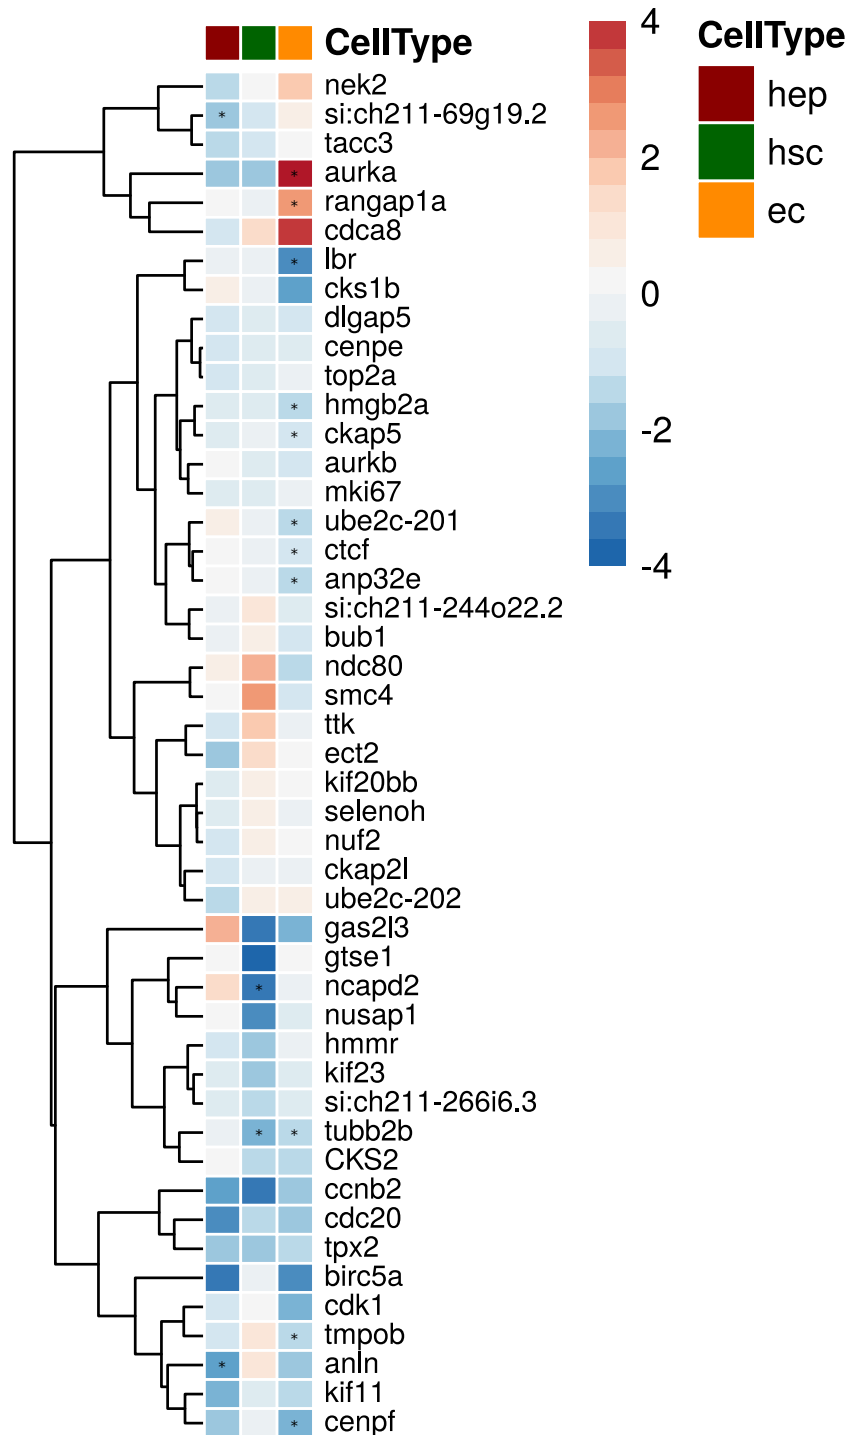

b

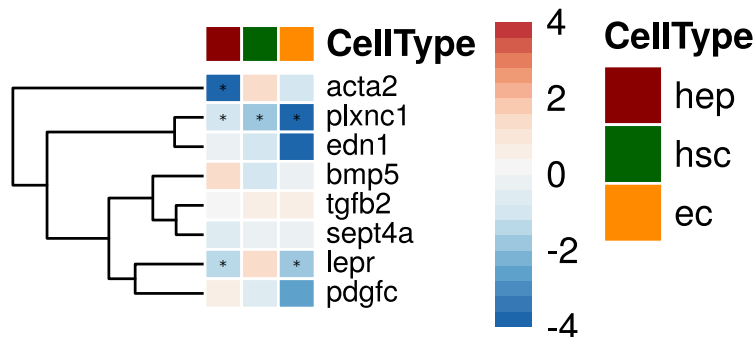

**Supplementary Figure 5. TAA induced changes in expression of selected marker genes.** a. Heatmap of G2M marker genes [99] log<sub>2</sub>FoldChanges after TAA treatment in corresponding cell types. Significantly differential genes were marked with an asterix. B. Heatmap of HSC activation marker genes [100] log<sub>2</sub>FoldChanges after TAA treatment in corresponding cell types. Significantly differential genes were marked with an asterix.

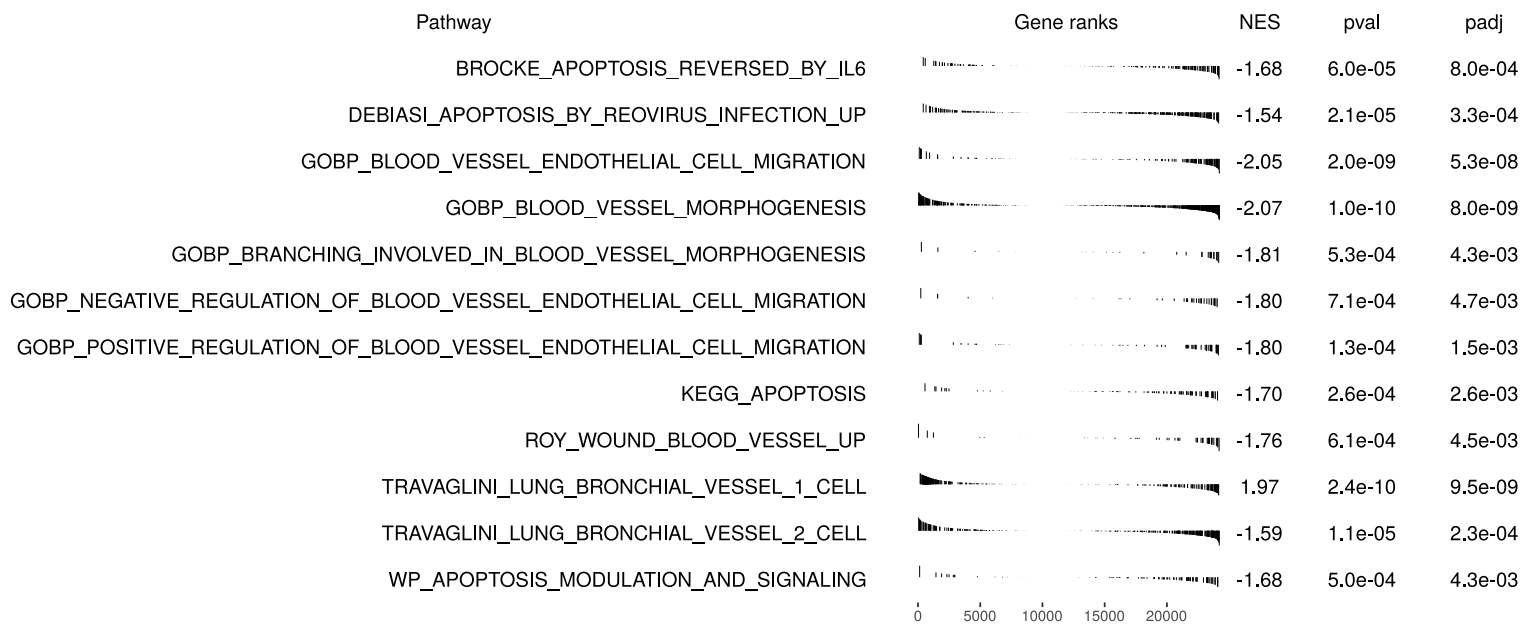

**Supplementary Figure 6. Gene Set Enrichment Analysis of selected molecular signatures.** Gene Set Enrichment Analysis of the apoptosis and vessel related molecular signatures in TAA induced EC.
